# Supplementary material for: Comparative Pharmacokinetics Study of Icariin and Icariside II in Rats
Source: MDPI journal article supplement (doi:10.3390/molecules201219763), 2015-12-01
Supplement: s1 [file s1]

# Supplementary Materials: Comparative Pharmacokinetics Study of Icariin and Icariside II in Rats

Tao Cheng, Yong Zhang, Tong Zhang, Lu Lu, Yue Ding and Yuan Zhao

**Table S1.** Pharmacokinetic parameters of ICA after oral administration of ICA dissolved in different solvents at 30 mg/kg (Mean  $\pm$  SD,  $n = 4$ ).

| Parameters                            | ICA Solution Prepared by PEG400 | ICA Solution Prepared by HS 15 Mixed Solution |
|---------------------------------------|---------------------------------|-----------------------------------------------|
| $T_{\max}$ (min)                      | 30.1 $\pm$ 12.2                 | 18.8 $\pm$ 7.5                                |
| $C_{\max}$ (ng/mL)                    | 24.7 $\pm$ 15.4                 | 20.1 $\pm$ 13.7                               |
| $t_{1/2z}$ (min)                      | 152.7 $\pm$ 103.3               | 93.1 $\pm$ 22.1                               |
| CL (L/min/kg)                         | 46.8 $\pm$ 16.9                 | 43.2 $\pm$ 10.9                               |
| $MRT_{0-t}$ (min)                     | 75.9 $\pm$ 17.4                 | 85.2 $\pm$ 14.6                               |
| $MRT_{0-\infty}$ (min)                | 109.1 $\pm$ 26.0                | 99.9 $\pm$ 22.1                               |
| $AUC_{0-t}$ (ng/mL $\times$ min)      | 664.4 $\pm$ 214.2               | 699.4 $\pm$ 159.9                             |
| $AUC_{0-\infty}$ (ng/mL $\times$ min) | 700.0 $\pm$ 220.7               | 724.6 $\pm$ 164.3                             |

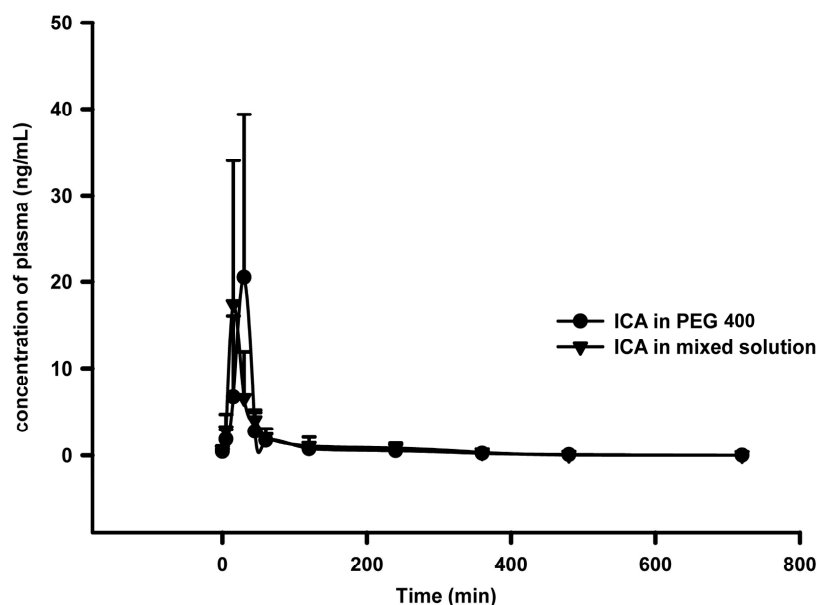

**Figure S1.** Mean plasma concentration-time curves of ICA in normal rats after oral administration of ICA dissolved in PEG400 and a mixed solution consisted of Solutol HS 15, PEG 400 and water (15:15:70) ( $n = 4$ ).
